# Supplementary material for: Effects of a Phytogenic Feed Additive on Redox Status, Blood Haematology, and Piglet Mortality in Primiparous Sows
Source: MDPI journal article supplement (doi:10.3390/stresses4020018), 2024-04-12
Supplement: s1 [file s1]

## **S1 (Footnote): Premix of vitamins/minerals**

GF per 30 Kg: Vit. A (3a672a) 12,000,000 iu, Vit. D<sub>3</sub> (3a671) 2,400,00, Vit. E (3a700) 100,000 mg, Vit. K (3a711) 2,000 mg, Vit. B<sub>1</sub> (3a821) 2,000 mg, Vit. B<sub>2</sub> 5,000 mg, Vit. B<sub>6</sub> (3a831) 6,000 mg, Vit. B<sub>12</sub> (3a315) 25 mg, Vit. B<sub>3</sub> (3a315) 40,000 mg, Vit. B<sub>5</sub> (3a841) 15,000 mg, folic acid (3a316) 4,000 mg, biotin (3a880) 300 mg, Vit. C (3a312) 105,000 mg, 3-phytase (4a1600) 500,000 FTU, 1,4-beta-xylanase 560,000 TXU, endo-β-1,4-glucanase 250,000 TGU, choline chloride (3a890) 360.000 mg, Mn(E5, manganese oxide) 60.000 mg, manganese chelate of glycine hydrate (E5) 27,200 mg, copper (3b405, copper sulphate pentahydrate) 20,000 mg, iron chelate of glycine hydrate (3b108) 12,000 mg, zinc oxide (3b603) 110,000 mg, zinc chelate of glycine hydrate (3b607) 30,000 mg, selenium (3b801, sodium selenite) 300 mg, iodine (3b202) 2,000 mg, BHT(E321) 4,500 mg, BHA(E320) 2,970 mg, E310 30 mg, E330 1, 500 mg

LF per 40 Kg: Vit. A (3a672a) 12,000,000 iu, Vit. D<sub>3</sub> (3a671) 2,400,00, Vit. E (3a700) 125,000 mg, Vit. K (3a711) 2,000 mg, Vit. B<sub>1</sub> (3a821) 2,000 mg, Vit. B<sub>2</sub> 5,000 mg, Vit. B<sub>6</sub> (3a831) 6,000 mg, Vit. B<sub>12</sub> (3a315) 25 mg, Vit. B<sub>3</sub> (3a315) 40,000 mg, Vit. B<sub>5</sub> (3a841) 15,000 mg, folic acid (3a316) 4,000 mg, biotin (3a880) 300 mg, Vit. C (3a312) 105,000 mg, β-carotene 5,000 mg, 1,4-beta-xylanase 560,000 TXU, endo-β-1,4-glucanase 250,000 TGU, choline chloride (3a890) 360.000 mg, Mn (E5, manganese oxide) 60.000 mg, manganese chelate of glycine hydrate (E5) 14,880 mg, copper (3b405, copper sulphate pentahydrate) 20,000 mg, copper chelate of glycine hydrate (3b413) 28,160, iron (3b10, iron sulphate monohydrate) 150,000 mg, iron chelate of glycine hydrate (3b108) 12,000 mg, zinc oxide (3b603) 110,000 mg, zinc chelate of glycine hydrate (3b607) 30,160 mg, selenium (3b801, sodium selenite) 300 mg, iodine (3b202) 2,000 mg, BHT(E321) 4,500 mg, BHA(E320) 2,970 mg, E310 30 mg, E330 1, 500 mg
